# Supplementary material for: Level of Palliative Care Complexity in Advanced Cancer Patients: A Multinomial Logistic Analysis
Source: J Clin Med. 2020 Jun 23;9(6):1960. doi: 10.3390/jcm9061960 (PMC7356562; doi:10.3390/jcm9061960)
Supplement: Supplementary file 1 [file jcm-09-01960-s001.pdf]

## Supplementary materials

**Table S1.** Diagnostic Tool for Complexity Classification in Palliative Care (IDC-Pal®).

|                            |                         | Items                                                                                          | Complexity level* | Yes | No |
|----------------------------|-------------------------|------------------------------------------------------------------------------------------------|-------------------|-----|----|
| 1. Patient                 | 1.1 History             | 1.1a The patient is a child or adolescent                                                      | HC                |     |    |
|                            |                         | 1.1b The patient is a healthcare professional                                                  | C                 |     |    |
|                            |                         | 1.1c Social-family role performed by patient                                                   | C                 |     |    |
|                            |                         | 1.1d Previous physical, psychological or sensorial disability                                  | C                 |     |    |
|                            |                         | 1.1e Recent and/or active addiction problems                                                   | C                 |     |    |
|                            |                         | 1.1f Previous mental illness                                                                   | C                 |     |    |
|                            | 1.2 Clinical Situation  | 1.2a Symptoms difficult to control                                                             | HC                |     |    |
|                            |                         | 1.2b Refractory symptoms                                                                       | HC                |     |    |
|                            |                         | 1.2c Urgent situations in the terminal cancer patient                                          | HC                |     |    |
|                            |                         | 1.2d Last hours/days of life difficult to control                                              | HC                |     |    |
|                            |                         | 1.2e Clinical situations due to cancer progression difficult to control                        | HC                |     |    |
|                            |                         | 1.2f Acute decompensated organ insufficiency in non-oncological terminal patient               | C                 |     |    |
|                            |                         | 1.2g Severe cognitive failure                                                                  | C                 |     |    |
|                            |                         | 1.2h Abrupt change in level of functional autonomy                                             | C                 |     |    |
|                            |                         | 1.2i Presence of comorbidity difficult to control                                              | C                 |     |    |
|                            |                         | 1.2j Severe constitutional syndrome                                                            | C                 |     |    |
|                            |                         | 1.2k Clinical management difficult due to repeated non-compliance with therapy                 | C                 |     |    |
|                            | 1.3 Psycho-Emotional    | 1.3a Risk of patient committing suicide                                                        | HC                |     |    |
|                            |                         | 1.3b Patient is asking to hasten the process of death                                          | HC                |     |    |
|                            |                         | 1.3c Patient presents existential anguish and/or spiritual suffering                           | HC                |     |    |
|                            |                         | 1.3d Communication conflicts between patient and family                                        | C                 |     |    |
|                            |                         | 1.3e Communication conflicts between patient and healthcare team                               | C                 |     |    |
|                            |                         | 1.3f Inadequate emotional coping by patient                                                    | C                 |     |    |
| 2. Family and environment  |                         | 2.a Absent or insufficient family support and/or caregivers                                    | HC                |     |    |
|                            |                         | 2.b Family members and/or caregivers not competent to give care                                | HC                |     |    |
|                            |                         | 2.c Dysfunctional family                                                                       | HC                |     |    |
|                            |                         | 2.d Family and/or caregiver burden                                                             | HC                |     |    |
|                            |                         | 2.e Complex bereavement                                                                        | C                 |     |    |
|                            |                         | 2.f Structural limitations of environment for the patient                                      | HC                |     |    |
| 3. Healthcare Organization | 3.1 Professionals /Team | 3.1a Application of palliative sedation difficult to manage                                    | HC                |     |    |
|                            |                         | 3.1b Difficulty in the indication and/or management of medication                              | C                 |     |    |
|                            |                         | 3.1c Difficulty in the indication and/or management of interventions                           | C                 |     |    |
|                            |                         | 3.1d Limitations of professional competence to address situations                              | C                 |     |    |
|                            | 3.2 Resources           | 3.2a Difficulty managing or acquiring instrumental techniques and/or specific material at home | C                 |     |    |
|                            |                         | 3.2b Difficulty managing coordination and logistic needs                                       | C                 |     |    |

|                |                                     |                                  |
|----------------|-------------------------------------|----------------------------------|
| *Score         | Items present                       | Specialized palliative care team |
| Highly complex | At least one high-complex item (HC) | Highly recommended               |

|             |                                  |                               |
|-------------|----------------------------------|-------------------------------|
| Complex     | At least one complex item<br>(C) | It might constitute a benefit |
| Non-complex | None of the items                | Not recommended               |
